# Supplementary material
Source: PubMed Central journal article supplement (PMC2801255)
Supplement: supp_M109.041954_jbc.M109.041954-1.pdf [file supp_M109.041954_jbc.M109.041954-1.pdf]

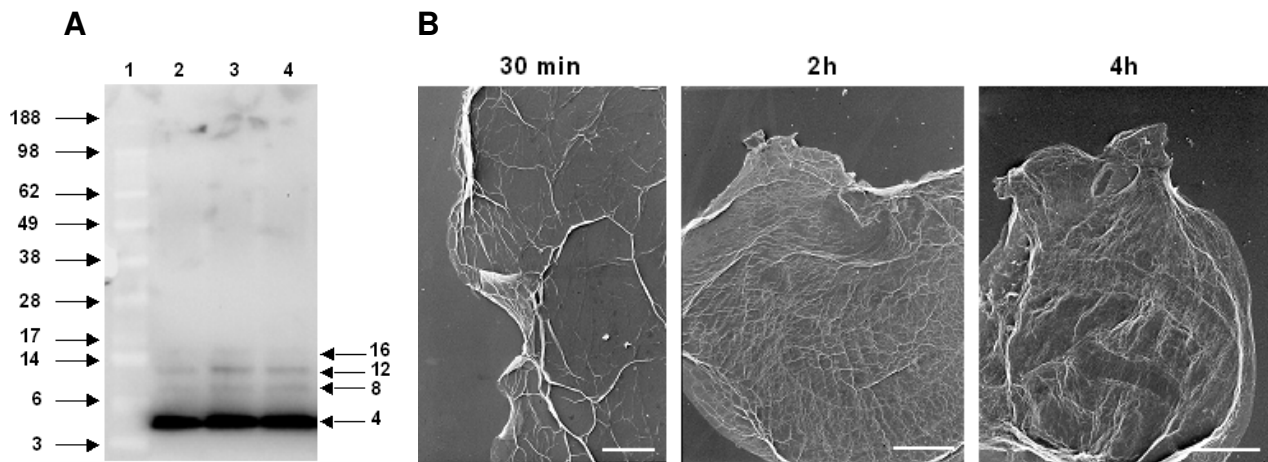

**Figure 1:** Representative immunoblot showed  $A\beta_{42}$  after its incubation for 48 h and then 30 min (lane 2), 2 h (lane 3) or 4 h (lane 4) in the culture medium at 37°C (**A**). Lane 1 contains a protein standard (Precision Plus Protein All Blue Standards, Bio-Rad Laboratories, Marnes-la-Coquette, France) to determine the molecular weights of  $A\beta_{42}$  oligomers. The anti-amyloid antibody recognizes a specific band at 4 kDa for monomeric form and three oligomers at 8, 12 and 16 kDa under non-denaturing conditions. This anti-amyloid antibody (clone 4G8) specifically recognizes between amino acids 18 and 22.  $A\beta_{42}$  fibrils were visualized by scanning electron microscopy on coverslips incubated with 20 $\mu$ M  $A\beta_{42}$  in the same experimental conditions. The  $A\beta_{42}$  fibril network was denser at 2 h and 4 h than at 30 min incubation. Bars: 100  $\mu$ m (**B**).

**Scanning electron microscopy for  $A\beta_{42}$  fibrils visualization.**  $A\beta_{42}$  was incubated for 48 h at 37°C and added in medium containing coverslips for 30 min, 2 h and 4 h. Coverslips with  $A\beta_{42}$  deposits were fixed for 2 h at 4°C with 100 $\mu$ M phosphate buffer (pH 7,4) containing 3% glutaraldehyde. After several rinses, they were post-fixed 1 h in 1% osmium tetroxide. Coverslips were washed again and dehydrated in acetone and dried by critical point drying (BAL-TEC CPD 030) using acetone and liquid carbon dioxide as the transition fluid. The

dried specimens were coated with gold (25-35 nm thickness) using a sputtering device (BAL-TEC LCD 005). The samples were examined in a JEOL JSM-840 electron microscope.

**State of exogenous  $A\beta_{42}$  assembly in SH-SY5Y cell cultures.** In **Figure SF1**, we showed that the major form of exogenous  $A\beta_{42}$  in the medium was the monomeric form (**A**). However, oligomers were also detected at 8, 12 and 16 kDa, particularly after 2 h and 4 h of 20 $\mu$ M  $A\beta_{42}$  treatment (**A**). By scanning electron microscopy,  $A\beta_{42}$  fibrils were observed as early as 30 min and sparingly distributed whereas the network of  $A\beta_{42}$  fibrils was highly dense after 2 h and 4 h of 20 $\mu$ M  $A\beta_{42}$  treatment (**B**).
