# Supplementary material
Source: PubMed Central journal article supplement (PMC2801255)
Supplement: supp_M109.041954_jbc.M109.041954-2.pdf [file supp_M109.041954_jbc.M109.041954-2.pdf]

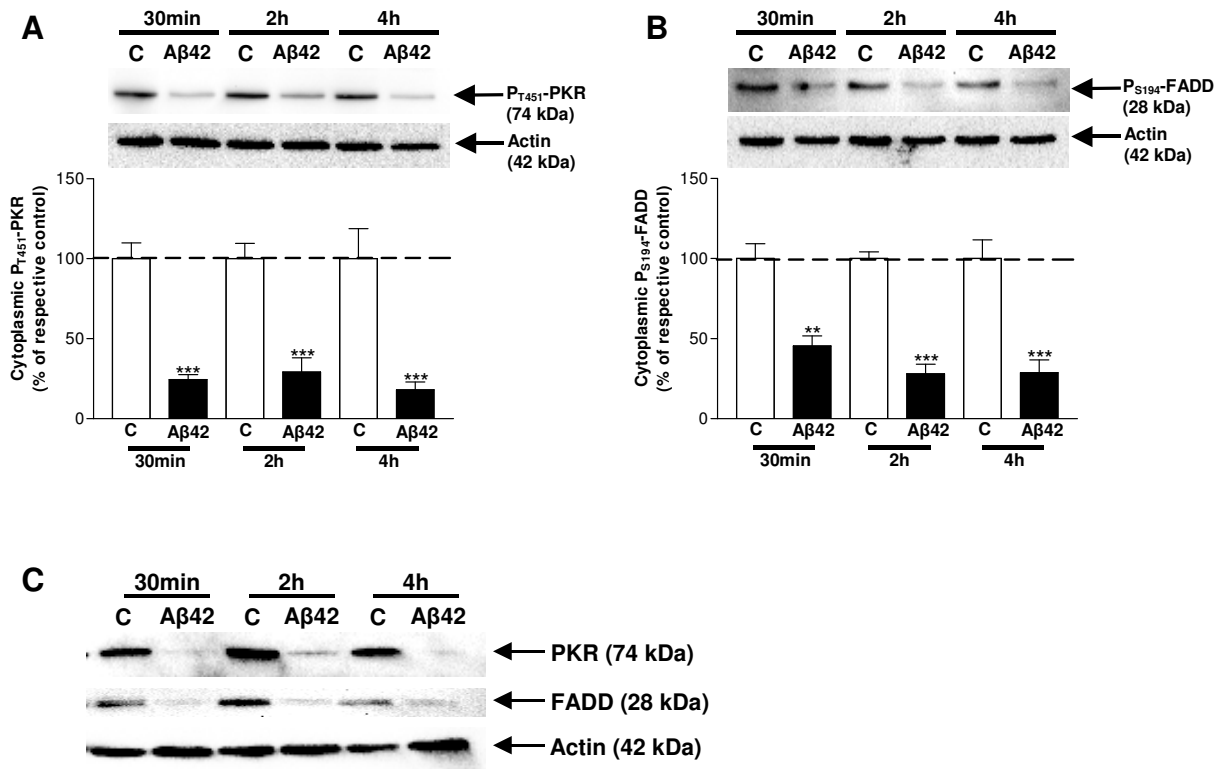

**Figure 2:** Representative blots showed the immunoreactivity of P<sub>T451</sub>-PKR (A), P<sub>S194</sub>-FADD (B), total forms of PKR and FADD (C) and corresponding actin in cytoplasmic extracts of Aβ42-treated SH-SY5Y cells (30min, 2h and 4h). Data were reported to those of the corresponding actin. The results are expressed as arbitrary units and were normalized compared with the respective time control. Results are mean ± SEM from 5 independent experiments in duplicate. \*\*\*p<0.001 compared with the respective control by one-way ANOVA followed by Newman-Keuls' test for multiple comparisons.
